# Supplementary material for: Distinct unfolded protein responses mitigate or mediate effects of nonlethal deprivation of C. elegans sleep in different tissues
Source: PubMed Central journal article supplement (PMC5572162; doi:10.1186/s12915-017-0407-1), 2017-08-28

Figure S1 - Sanders et al.

Lethargus  
*hsp-60p::gfp*

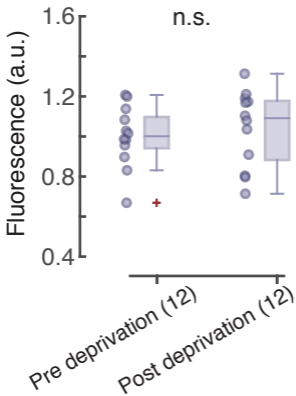

Supplement: 12915_2017_407_MOESM1_ESM.pdf [file 12915_2017_407_MOESM1_ESM.pdf]
